# Supplementary material for: Soil andic properties as powerful factors explaining deep soil organic carbon stocks distribution: the case of a coffee agroforestry plantation on Andosols in Costa Rica
Source: Copernicus journal article supplement (doi:10.5194/soil-2019-14), 2019-04-23

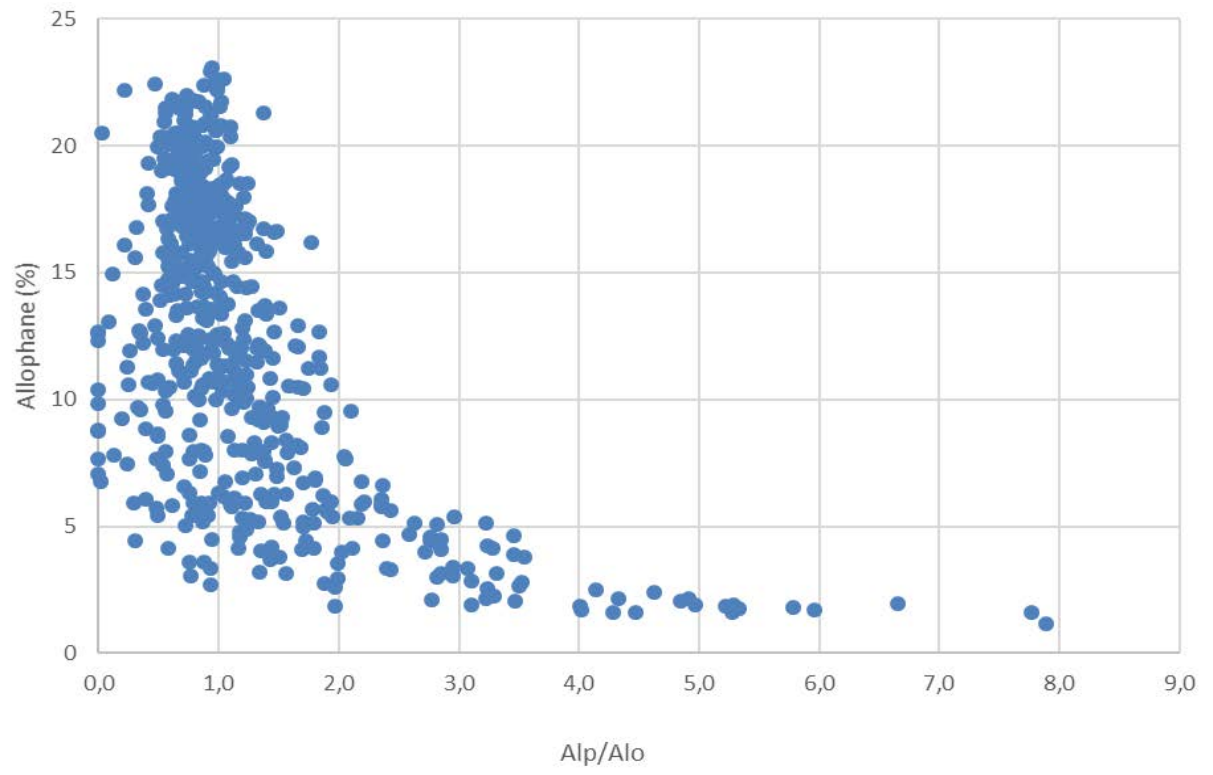

Supplement: Supplementary file [file soil-2019-14-AC2-supplement.pdf]
